# *fras1* shapes endodermal pouch 1 and stabilizes zebrafish pharyngeal skeletal development

Jared Coffin Talbot<sup>1,\*</sup>, Macie B. Walker<sup>2</sup>, Thomas J. Carney<sup>3</sup>, Tyler R. Huycke<sup>1</sup>, Yi-Lin Yan<sup>1</sup>, Ruth A. BreMiller<sup>1</sup>, Linda Gai<sup>1</sup>, April DeLaurier<sup>1</sup>, John H. Postlethwait<sup>1</sup>, Matthias Hammerschmidt<sup>4</sup> and Charles B. Kimmel<sup>1,‡</sup>

## SUMMARY

Lesions in the epithelially expressed human gene *FRAS1* cause Fraser syndrome, a complex disease with variable symptoms, including facial deformities and conductive hearing loss. The developmental basis of facial defects in Fraser syndrome has not been elucidated. Here we show that zebrafish *fras1* mutants exhibit defects in facial epithelia and facial skeleton. Specifically, *fras1* mutants fail to generate a late-forming portion of pharyngeal pouch 1 (termed late-p1) and skeletal elements adjacent to late-p1 are disrupted. Transplantation studies indicate that *fras1* acts in endoderm to ensure normal morphology of both skeleton and endoderm, consistent with well-established epithelial expression of *fras1*. Late-p1 formation is concurrent with facial skeletal morphogenesis, and some skeletal defects in *fras1* mutants arise during late-p1 morphogenesis, indicating a temporal connection between late-p1 and skeletal morphogenesis. Furthermore, *fras1* mutants often show prominent second arch skeletal fusions through space occupied by late-p1 in wild type. Whereas every *fras1* mutant shows defects in late-p1 formation, skeletal defects are less penetrant and often vary in severity, even between the left and right sides of the same individual. We interpret the fluctuating asymmetry in *fras1* mutant skeleton and the changes in *fras1* mutant skeletal defects through time as indicators that skeletal formation is destabilized. We propose a model wherein *fras1* prompts late-p1 formation and thereby stabilizes skeletal formation during zebrafish facial development. Similar mechanisms of stochastic developmental instability might also account for the high phenotypic variation observed in human *FRAS1* patients.

**KEY WORDS:** *fras1*, Zebrafish, Craniofacial, Fraser syndrome, Developmental instability

## INTRODUCTION

Human *FRAS1* lesions cause Fraser syndrome (McGregor et al., 2003; Slavotinek et al., 2006; van Haelst et al., 2008), a complex disorder with numerous variably expressed symptoms, including ear defects and other craniofacial birth defects (Fraser, 1962; Gattuso et al., 1987; Slavotinek and Tift, 2002; Thomas et al., 1986; van Haelst et al., 2007). The symptoms of Fraser syndrome vary extensively in both presence and severity from one patient to another. Fraser syndrome variation has been a topic of intense interest to clinicians since the syndrome was first described (Fraser, 1962), and yet the causes of this variability have remained unclear. Models have been proposed in which genetic modifiers control the degree of symptomatic variation (e.g. Slavotinek and Tift, 2002). Subsequent studies revealed that other members of the *FRAS1* protein complex (the Fraser complex) can cause Fraser syndrome (Jadeja et al., 2005; Shafeghati et al., 2008) or related diseases (Alazami et al., 2009; Slavotinek et al., 2011), explaining some of the causes of the different Fraser spectrum diseases. However, a wide range of symptoms are present even in patients carrying genetic lesions that are likely to severely disrupt *FRAS1* function

(van Haelst et al., 2008). For instance, siblings can show life and death differences in symptomatic expressivity (Prasun et al., 2007). Other models focus on stochastic sources of variation in Fraser syndrome, noting that symptoms (cryptophthalmos) can vary between left and right sides of patients at frequencies predicted by chance (Cavalcanti et al., 2007).

Similar to the epithelial abnormalities frequently found in Fraser syndrome (e.g. Slavotinek and Tift, 2002), severe epithelial defects are present in *Fras1* mutant mice (McGregor et al., 2003; Vrontou et al., 2003) and *fras1* mutant zebrafish (Carney et al., 2010). In mouse (McGregor et al., 2003; Vrontou et al., 2003) and zebrafish (Gautier et al., 2008), *Fras1/fras1* mRNA is expressed by epithelial cells, including endoderm and ectoderm lining the pharyngeal arches. *Fras1* encodes a transmembrane protein containing motifs implicated in signaling and adhesion (Gautier et al., 2008; McGregor et al., 2003). The large extracellular portion of *Fras1* is cleaved and released into basal lamina underlying epithelia (Carney et al., 2010; Chiotaki et al., 2007; Kiyozumi et al., 2006; Petrou et al., 2007). Hence, a layer of *Fras1* protein surrounds the neural crest-derived skeletogenic portion of pharyngeal arches. This layer of *Fras1* protein might signal to arches or physically connect epithelia and arch mesenchyme during processes such as endodermal pouch formation.

In this study we use zebrafish to model craniofacial symptoms of Fraser syndrome, particularly conductive hearing loss. In humans, derivatives of the first endodermal pouch (pouch 1, or p1) contribute to the Eustachian tube, whereas neural crest-derived cells in the first two arches contribute to the jaw and middle ear skeletons. Here we describe a previously unrecorded late-forming portion of the first pharyngeal pouch (termed late-p1) in zebrafish. We show that zebrafish *fras1* is required for the formation of late-p1 and that *fras1*

<sup>1</sup>Institute of Neuroscience, 1254 University of Oregon, Eugene, OR 97403-1254, USA. <sup>2</sup>Department of Pediatrics, University of Colorado Denver Anschutz Medical Campus, Aurora, Colorado 80045, USA. <sup>3</sup>Institute of Molecular and Cell Biology, Proteos, Singapore 138673. <sup>4</sup>Institute for Developmental Biology, Center for Molecular Medicine Cologne, and Cologne Excellence Cluster on Cellular Stress Responses in Aging-Associated Diseases, University of Cologne, 50937 Cologne, Germany.

\*Present address: Department of Molecular and Cell Biology, 555 Life Sciences Addition, MC3200, University of California at Berkeley, Berkeley, CA 94720, USA  
‡Author for correspondence (kimmel@uoneuro.uoregon.edu)

mutants often show defects in skeletal elements which, in wild-type (WT) fish, form near late-p1. We find that WT endoderm rescues both epithelial and skeletal defects in *fras1* mutants, indicating that epithelial *fras1* non-autonomously sculpts nearby facial skeleton. Using time-lapse and timecourse analysis, we find that the late-p1 defects in *fras1* mutants arise alongside some cartilage defects, but prior to others. The physical relationship between late-p1 and second arch cartilages suggests that the late-forming second arch cartilage fusions may occur in *fras1* mutants because late-p1 is unable to physically stabilize cartilage formation. For instance, late-p1 might physically prevent fusion between symplectic and ceratohyal cartilages. Late-p1 might also help pull apart first arch cartilages, or bring signaling cues to the presumptive first arch joint that ensure joint formation. *fras1* mutants show fluctuating left-right asymmetries in all skeletal defects, suggesting that stochastic developmental instability might govern the degree of phenotypic defect in the zebrafish *fras1* mutant skeleton. We propose a model wherein *fras1* acts in endoderm to generate late-p1 and to stabilize the development of nearby skeletal elements.

## MATERIALS AND METHODS

### Fish maintenance, husbandry, morpholinos and strains

Fish were raised as described (Kimmel et al., 1995; Westerfield, 2007). Mutant lines were maintained on the genetic backgrounds shown in Table 1. We identified *fras1* mutants using previously described fully penetrant

tail fin blisters or previously described PCR genotyping protocols (Carney et al., 2010). Unless stated otherwise, the *b1048* allele of *fras1* is used. *b1048* causes a premature stop codon prior to the vital transmembrane domain of Fras1; similar to previous reports using *fras1*<sup>te262</sup> (Carney et al., 2010), we find that anti-Fras1 label is lost in *fras1*<sup>b1048</sup> (Fig. 1A,B), confirming that *b1048* causes a strong loss of *fras1* function. Furthermore, this Fras1 antibody was produced using an epitope prior to the *b1048* and *te262* lesions, so the loss of anti-Fras1 label observed in *te262* (Carney et al., 2010) and *b1048* (Fig. 1A',B') mutants suggests that the entire Fras1 protein is lost in fish homozygous for *fras1*<sup>te262</sup> or *fras1*<sup>b1048</sup>. A transgenic line formally named *sox9a*<sup>z81Tg</sup> (see <https://www.facebase.org/fishface/home>) expresses EGFP in cartilage cells under the likely control of a *sox9a* enhancer; for clarity, we refer to the line as *sox9a:EGFP*. *sox10:mRFP* (Kirby et al., 2006) and *her5:GFP* (Tallafuss and Bally-Cuif, 2003) are described elsewhere.

### Tissue labeling

RNA in situ hybridization was performed as described (Rodriguez-Mari et al., 2005) using *fras1* probe (Carney et al., 2010). For RNA in situ hybridization, embryos were raised in 0.0015% 1-phenyl 2-thiourea (PTU) to inhibit melanogenesis (Westerfield, 2007). Alcian Blue and Alizarin Red staining were performed as described (Walker and Kimmel, 2007). Epithelia were labeled with antibodies to human TP63 (P63 4A4, sc-8431, Santa Cruz Biotechnology) and zebrafish Fras1 (Carney et al., 2010), using a protocol available at ZFIN (<https://wiki.zfin.org/x/XACiAQ>). Image processing utilized LSM (Carl Zeiss), Volocity (PerkinElmer), ImageJ (NIH) and MetaMorph (Molecular Devices) software.

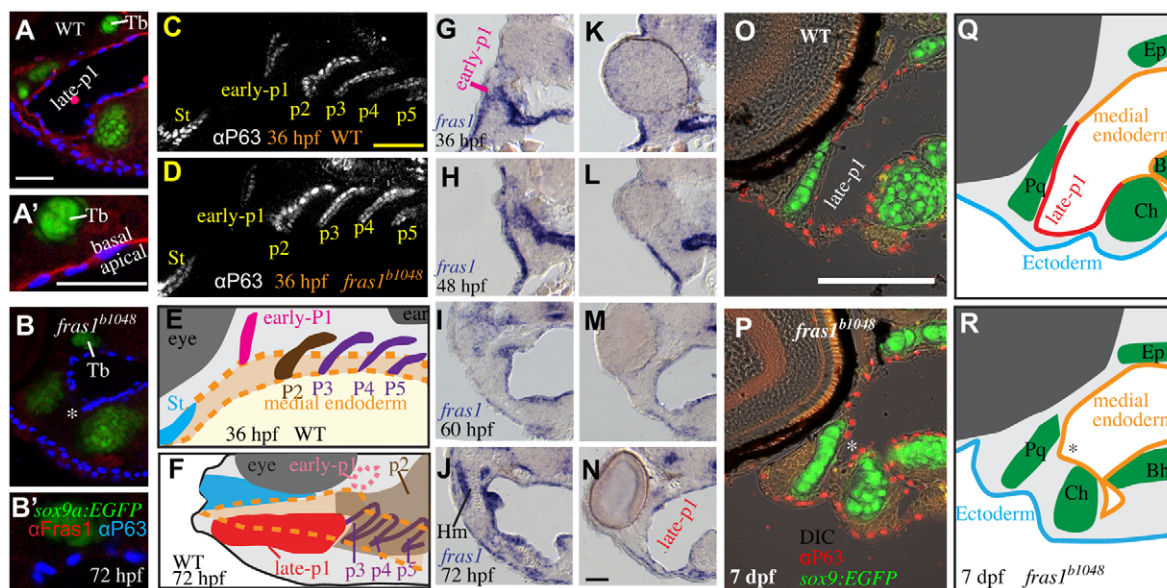

**Fig. 1. Zebrafish *fras1* mutants show specific late-p1 defects.** (A-B') Transverse sections of antibody-stained tissues, oriented lateral to left, dorsal up. (B) At the section level of late-p1, *fras1* mutant endoderm does not extend as far laterally (asterisk) as WT endoderm at 72 hpf. (A',B') High-resolution detail near trabecula (Tb) from A and B shows that (A') WT Fras1 is deposited basal to the epithelial nuclei marker and (B') anti-Fras1 label is absent from *fras1* mutants. Because these insets are from the roof of the mouth, basal is up and lateral is to the left. (C-E) By contrast, early pouches appear normal in *fras1* mutants. (C,D) Confocal section of (C) WT and (D) *fras1* mutant epithelia at 36 hpf, oriented anterior to left, dorsal up. Note that the early forming portion of pouch 1 is only mildly misshapen in *fras1* mutants and posterior pouches appear normal. (E) Diagram of WT pouch structure at 36 hpf, viewed with anterior to left, dorsal up. Medial endoderm (orange dashed lines) lies beneath the plane of section shown in G and H (see supplementary material Fig. S2). Yolk is in yellow and somatic tissue is gray. (F) Diagram of pouch derivatives at 72 hpf, viewed with anterior to left, dorsal up. Between 36 and 72 hpf, late-p1 has protruded laterally, early-p1 has been covered by cartilages, and pouch 2 (p2) has extended posteriorly, covering posterior pouches. (G-N) RNA in situ hybridization on tissue sections, shown lateral to left, dorsal up. Epithelial *fras1* expression lines pharyngeal arches during late-p1 formation. (G-J) Sections through early-p1 show that this early forming pouch is eventually covered by the hyomandibular cartilage, whereas (K-N) late-p1 protrudes laterally, anterior to early-p1. (O,P) Transverse sections of antibody-stained tissues, oriented lateral to left, dorsal up. Endodermal pouching defect persists in *fras1* mutants at 7 dpf (asterisk). (Q,R) Illustrations of 7-dpf tissue sections, indicating the location of late-p1. Endoderm abbreviations: early-p1, early forming portion of pouch 1; late-p1, late-forming portion of pouch 1; p3, pouch 3; p4, pouch 4; p5, pouch 5; St, stomadeum. Cartilage abbreviations: Pq, palatoquadrate; Ch, ceratohyal; Bh, basihyal; Ep, ethmoid plate; Hm, hyomandibular. Scale bars: 50  $\mu$ m (in A,A',C,O for B,B',D,P, respectively; in N for G-N).



### Time-lapse microscopy

When imaged on a Zeiss Pascal LSM 5 laser-scanning microscope, mounting was essentially as described (Westerfield, 2007). An inverted microscope (Leica SD6000 spinning-disk confocal microscope with Borealis Illumination Technology) allowed concurrent imaging of multiple fish. For this latter set-up, fish were mounted in 0.4% agarose in glass-bottom dishes and covered with embryo medium containing 80 mg/l clove oil (Hilltech). After imaging, all fish were raised for several days, then re-examined for skeletal morphology and to confirm health.

### Cartilage scoring

Fish were visually examined for overt mutant phenotypes. Any ectopic connection of skeletal elements (cartilage fusion) was scored as 'fused'. Symplectic cartilages were scored as 'short' if they were less than two-thirds the mean WT length. Symplectic length was scored independently of symplectic fusion whenever possible. Phenotypic penetrance is the proportion of fish expressing a given defect. Phenotypes scored on fixed Alcian Blue-stained preparations (Table 1) showed similar penetrances to live scoring using *sox9a:EGFP* expression (Table 2). Overall defects are represented by a 'defect score': the average sum of Meckel's to palatoquadrate fusion, symplectic to ceratohyal fusion, short symplectic phenotypes, including both sides of a fish. Statistical analyses used JMP 9.0 (SAS Institute, Cary, NC, USA) software. Fluctuating asymmetry was analyzed following the prescribed guidelines (Palmer and Strobeck, 2003).

### Endoderm transplantation

Endoderm transplantation experiments were performed (supplementary material Fig. S1) essentially as described (Crump et al., 2004a; Crump et al., 2004b; Walker et al., 2007). In brief, donors were injected at early one-cell stage with *TARAB*\* RNA and 1% Rhodamine-dextran. At 3-4 hours post-fertilization (hpf), 20-30 donor cells were transferred to host embryos near the yolk margin. At 34-38 hpf, hosts were selected on the basis of strong labeling of medial endoderm underlying the first two arches and early pouch 1. Hosts were raised to 7 days post-fertilization (dpf) and imaged. Host tails (not labeled with donor) and donor embryos were PCR genotyped.

## RESULTS

### *fras1* mutation consistently disrupts late-p1 formation

Because *fras1* is expressed in the basal lamina of facial epithelia (Fig. 1A-B') and is known to sculpt epithelia, we assayed the shape of facial epithelia in *fras1* mutants. We find that an anterior portion of epithelia is consistently misshapen in all *fras1* mutants (Fig. 1A,B). In WT fish, anterior endoderm is closely juxtaposed with anterior ectoderm at 72 hpf (Fig. 1A). However, in *fras1* mutants, anterior endoderm is situated medially at 72 hpf (Fig. 1A,B).

Pharyngeal pouches form via lateral protrusion of endoderm, connecting medial endoderm to ectoderm; successive pouches segment the arches along the anterior-posterior (A-P) axis (reviewed by Graham et al., 2005). The *fras1*-dependent endodermal protrusion is the most anterior portion of endoderm to abut with ectoderm, indicating that it is a portion of the first pharyngeal pouch (pouch 1, or p1). Although *fras1* mutants show pronounced pouch 1 defects by 72 hpf (Fig. 1A,B), the early forming and well-known dorsal portion of the first pouch (termed 'early-p1'; Fig. 1, supplementary material Fig. S2) appears normal in *fras1* mutants at 36 hpf (Fig. 1C-E). Early-p1 appears to contribute primarily to a dorsal structure, medial to the hyomandibular cartilage (Fig. 1F-J).

*fras1*-expressing endoderm, situated between early-p1 and the stomadeum, continues to migrate laterally between 36 and 72 hpf (Fig. 1K-N). Ectoderm remains flat over arches between 36 and 72 hpf (Fig. 1G-N), indicating that late-p1 formation occurs primarily via endoderm protrusion rather than ectodermal intrusion. The pouch 1 defect persists in *fras1* mutants until at least 168 hpf (Fig.

1O-R), while the rest of the fish develops normally, indicating that anterior endoderm defects are not simply caused by developmental delay. Serial sections reveal that only this most anterior pouch is affected, both in *fras1*<sup>b1048</sup> (*n*=8/8; Fig. 2A-G) and *fras1*<sup>te262</sup> (*n*=8/8) mutants at 72 hpf, consistent with the normal formation of

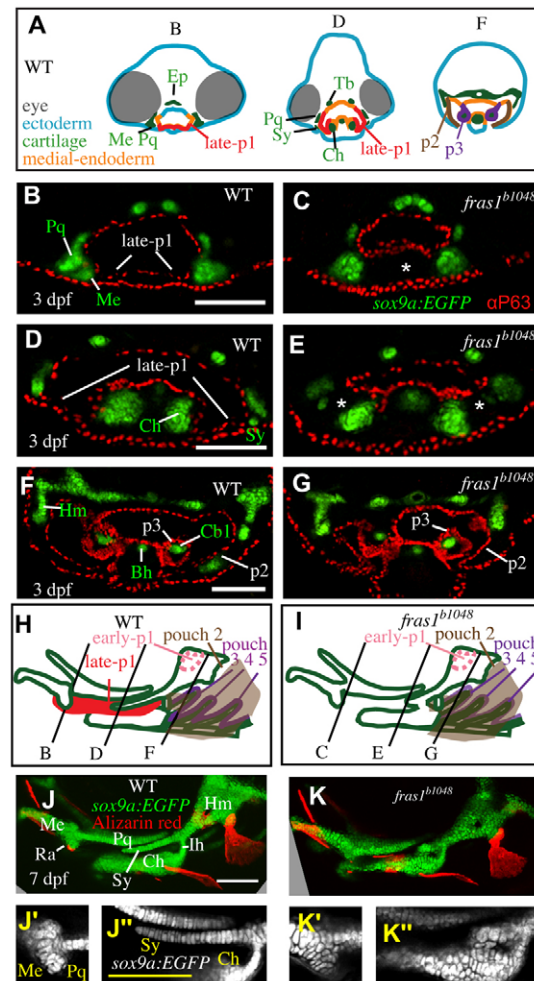

**Fig. 2. Skeletal elements near late-p1 are affected by *fras1* mutation.**

(A) Illustrations of WT epithelia and cartilage on transverse sections, shown dorsal up. Ep, ethmoid plate; Tb, trabecula. (B-G) Tissue sections labeled with anti-P63 and *sox9a:EGFP*, taken from the section level of (B,C) Meckel's-palatoquadrate joint, (D,E) symplectic cartilage, and (F,G) opercular flap. By 72 hpf, *fras1* mutants exhibit loss (asterisk) of late-p1 (B-E) but not p2 or p3 (F,G) derivatives. (H,I) Illustrations of 7-dpf cartilaginous skeletons, showing how pouch derivatives intersect with cartilages and how the sections shown in B-G map onto 7-dpf skeletons; shown anterior to left, dorsal up. (J-K') Confocal projections of live-imaged fish showing bone (Alizarin Red staining) and cartilage (*sox9a:EGFP* expression). Dermal bone morphology typically resembles WT (J) in *fras1* mutants (K), although mild opercle bone defects are sometimes found in *fras1* mutants (not shown). Inset confocal sections highlight morphology at first arch-derived (J',K') and second arch-derived (J'',K'') joint regions. Fully expressive *fras1* mutants display distinct cartilage defects including (K') M-Pq fusion and (K'') Sy-Ch fusion with short Sy. Arch 1-derived cartilages: Me, Meckel's cartilage; Ra, retroarticular process of Meckel's cartilage; Pq, palatoquadrate. Arch 2-derived cartilages: Cb1, first ceratobranchial cartilage; Ch, ceratohyal; Ih, interhyal; Hm, hyomandibular; Sy, symplectic. Scale bars: 100  $\mu$ m (applicable to each row).

**Table 1. The early-stop *fras1* alleles cause similar skeletal defects**

| Allele                       | n   | Genetic background | Defect score | Me-Pq fusion | Ra reduced | Sy-Ch fusion | Sy short | lh reduced |
|------------------------------|-----|--------------------|--------------|--------------|------------|--------------|----------|------------|
| WT                           | 581 | Mixed              | 0.0          | 0%           | 0%         | 0%           | 0%       | 0%         |
| <i>fras1<sup>tm95b</sup></i> | 29  | TU                 | 0.3          | 10%          | 5%         | 0%           | 9%       | 0%         |
| <i>fras1<sup>te262</sup></i> | 37  | TU                 | 3.5          | 57%          | 14%        | 59%          | 59%      | 4%         |
| <i>fras1<sup>b1048</sup></i> | 120 | AB × WIK           | 3.2          | 52%          | 0%         | 54%          | 55%      | 10%        |
| <i>fras1<sup>b1130</sup></i> | 93  | AB × EKK           | 3.5          | 33%          | 2%         | 83%          | 56%      | 3%         |

Three *fras1* alleles causing premature stops cause similar skeletal defects. The fourth allele, *fras1<sup>tm95b</sup>*, which contains a missense mutation, is thought to be hypomorphic (Carney et al., 2010). Shown are penetrances of skeletal defects per side of 7-dpf fixed fish stained with Alcian Blue and Alizarin Red. The genetic background of each allele is indicated. WT data combine scoring of WT siblings of each mutant allele.

Ch, ceratohyal; lh, interhyal; Me, Meckel's; Pq, palatoquadrate; Ra, retroarticular process of Meckel's cartilage; Sy, symplectic.

posterior pouches at 36 hpf (Fig. 1). Hence, we conclude that *fras1* is specifically required for epithelial morphogenesis that generates a late-forming portion of pouch 1, hereafter referred to as 'late-p1'.

### Skeletal elements near late-p1 are often disrupted in *fras1* mutants

Skeletal elements near late-p1 are frequently abnormal in *fras1* mutants (Fig. 2). In 72-hpf WT fish, late-p1 separates the ceratohyal cartilage from Meckel's, palatoquadrate and symplectic cartilages (Fig. 2A-H). *fras1* mutants show three major skeletal defects, all in cartilages adjacent to late-p1 (Fig. 2H-K''): Meckel's to palatoquadrate fusion (Me-Pq fusion; Table 1, Fig. 2J',K'); shortened symplectic length (short Sy; Table 1, Fig. 2J'',K''); and symplectic to ceratohyal fusion (Sy-Ch fusion; Table 1, Fig. 2J'',K''). All three early-stop *fras1* alleles show the same skeletal phenotypes with similar penetrance (Table 1). Skeletal defects near late-p1 are also present, although rare, in a hypomorphic *fras1* allele (*tm95b*; Table 1). By contrast, skeletal elements further from late-p1, such as the interhyal cartilage, hyomandibular cartilage and the opercle bone, are relatively normal in *fras1* mutants (Fig. 2J-K'', Table 1). Hence, we hypothesize that *fras1* functions in late-p1 to non-autonomously shape nearby cartilage elements during development.

### WT endoderm rescues *fras1* mutants

*fras1* is expressed in epithelia, not skeleton, so we hypothesize that *fras1* functions non-cell-autonomously to sculpt the facial skeleton. We tested this hypothesis with reciprocal transplants between WT and *fras1* mutant fish (Fig. 3). Labeled WT endoderm transplanted into unlabeled WT hosts (WT→WT transplants) marks late-p1 (19/19 transplants; Fig. 3A,A'), confirming the endodermal origin of this structure. As expected, *fras1* mutant endoderm is unable to produce late-p1 when transplanted into *fras1* mutant hosts (6/6 transplants; Fig. 3B,B'), and *fras1*→*fras1* transplants show skeletal defects with the variation expected for non-mosaic *fras1* mutants (Table 1). However, when WT endoderm is transplanted into *fras1* mutant hosts (7/7 transplants; Fig. 3C,C'), both late-p1 and cartilage shapes appear similar to those of WT→WT transplants, indicating that WT endodermal *fras1* expression rescues facial development in fish otherwise mutant for *fras1*. For example, in WT→*fras1* transplants the symplectic cartilage is elongated normally and no cartilage fusions are seen (Fig. 3C,C'). When *fras1* mutant endoderm is transplanted into WT hosts, late-p1 defects are sometimes seen in the second pharyngeal arch (6/12 hosts; Fig. 3D,D'), but even when present, neither the late-p1 nor skeletal defects are as pronounced as in non-mosaic *fras1* mutants

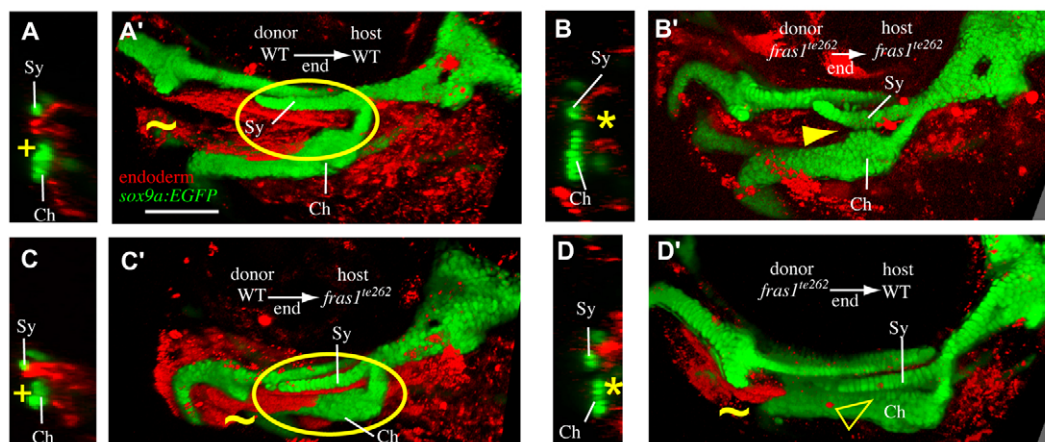

**Fig. 3. Endodermal *fras1* sculpts epithelia and skeleton.** Confocal transverse sections taken at a section level midway through Sy length at 7 dpf. Medial to right, dorsal up. (A) In mosaic fish in which WT endoderm has been transplanted into WT hosts (WT→WT mosaics), late-p1 appears normal (+) and is labeled as endoderm. (B) In *fras1<sup>te262</sup>*→*fras1<sup>te262</sup>* mosaic fish, late-p1 does not form, and anterior endoderm remains medial to cartilages (asterisk). (C) WT endoderm transplanted into *fras1<sup>te262</sup>* mutants rescues the late-p1 defects of these hosts. (D) Half of the *fras1<sup>te262</sup>*→WT mosaics examined exhibited defective endoderm medial to Sy and Ch. (A'-D') Rendered confocal stacks show endoderm and skeletal morphology; oriented anterior to the left, dorsal up. Image rendering makes both tissues opaque, allowing visualization of late-p1 covering separated Sy and Ch cartilages (circled). In WT→WT (A') and WT→*fras1<sup>te262</sup>* (C') mosaics, late-p1 covers part of Ch. However, in *fras1<sup>te262</sup>*→*fras1<sup>te262</sup>* mosaics, fused cartilages cover the medial endoderm (arrowhead). Half of the *fras1<sup>te262</sup>*→WT mosaics show late-p1 defects, but cartilage defects are more subtle than in non-mosaic *fras1<sup>te262</sup>* mutants, perhaps owing to the presence of late-p1 in the first pharyngeal arch (tilde). Scale bar: 100 μm.

(see Discussion). Our transplantation experiments support the hypothesis that endodermally expressed *fras1* sculpts both endoderm and skeleton.

### ***fras1*-dependent cartilage morphogenesis proceeds concurrently with late-p1 formation**

In addition to occurring in the same space as late-p1 formation, *fras1*-dependent skeletal elements develop during the same time as late-p1. In *fras1* mutants, late-p1 formation fails between 36 and 72 hpf (Figs 1, 4). The lateral migration of WT late-p1 can be quantified by the dramatic decrease in the distance between anterior endoderm and anterior ectoderm that occurs between 36 and 72 hpf (Fig. 4A-J). By contrast, all *fras1* mutants, lacking late-p1 morphogenesis, maintain large endoderm to ectoderm distances from 36-72 hpf (Fig. 4A-J). This same 36-72 hpf time window is a period of dramatic skeletal morphogenesis (supplementary material Movie 1). For instance, the symplectic cartilage protrudes anteriorly between 36 and 72 hpf, and symplectic protrusion is frequently reduced in *fras1* mutants slightly after late-p1 formation initiates (Fig. 4K-M). By contrast, *fras1* mutant hyomandibular length increases normally during this time interval (supplementary material Fig. S3), indicating that the *fras1* mutant symplectic length defect is not the result of a general developmental delay.

Two-color time-lapse microscopy of WT cartilage and endoderm development confirms that WT late-p1 moves laterally into the space between palatoquadrate and ceratohyal cartilages, concurrent with symplectic extension (Fig. 5). In WT fish, cells that form the symplectic migrate out of the path that endoderm will follow during late-p1 formation (supplementary material Movie 2), with the tip of the symplectic moving anteriorly, immediately dorsal to

late-p1 (Fig. 5, supplementary material Movie 2). Similarly, Meckel's cartilage separates from palatoquadrate cartilage between 36 and 72 hpf in WT fish (supplementary material Movie 3). In *fras1* mutants, Meckel's cartilage often fails to separate from palatoquadrate cartilage during this time interval (supplementary material Movie 3). Hence, many *fras1*-dependent aspects of skeletal morphogenesis occur at a very similar time as *fras1*-dependent late-p1 formation, further indicating a connection between *fras1* function in skeletal and epithelial morphogenesis.

### **Symplectic to ceratohyal fusion often occurs long after late-p1 formation**

Although in *fras1* mutants some skeletal defects begin to develop during the same time interval as late-p1 defects, we often observe fusion between symplectic and ceratohyal cartilages long after 72 hpf (Fig. 6A-B', Table 2). Often, individual *fras1* mutant fish lacking Sy-Ch fusions at 3.5 dpf will show Sy-Ch fusions when examined 1 day later (Table 2), and the probability of fusion increases further by 7.5 dpf (Fig. 6A-B', Table 2). Both the Me-Pq (Fig. 6C-D') and Sy-Ch (not shown) fusions persist once they form.

The difference in timing between Me-Pq and Sy-Ch fusions might be caused by different mechanisms of fusion. 'Short' mutant symplectic cartilages resemble younger, unextended WT symplectic cartilages. Similarly, Me-Pq fusions resemble unseparated WT cartilages (supplementary material Movie 3) due to failure of cleft formation between *fras1* mutant Meckel's and palatoquadrate cartilages. However, symplectic to ceratohyal fusions are never seen during WT development (supplementary material Movies 1, 2, 4). Instead, time-lapse microscopy of

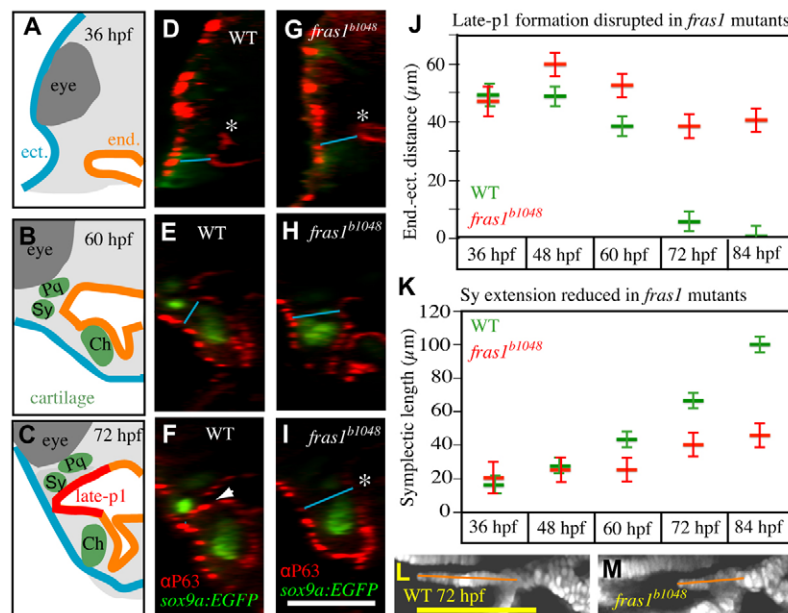

**Fig. 4. *fras1*-dependent symplectic extension occurs concurrently with late-p1 formation.** (A-C) Schematics of the transverse sections shown in D-I, illustrating ectoderm (blue), endoderm (orange), cartilage (green), somatic tissue (gray) and eye (dark gray). (D-I) Transverse view of confocal stacks, showing WT late-p1 formation between 36 and 72 hpf (D-F, arrowhead), which fails (asterisk) in *fras1* mutants (G-I). (J,K) Measurements of (J) endoderm-ectoderm distances and (K) Sy lengths, taken from the same fish. (J) Minimum distance between endoderm and ectoderm measured as illustrated (blue lines in D-I) on randomly selected fish. Endoderm-ectoderm distance decreases in WT fish but remains relatively constant in *fras1* mutants. (K) Symplectic length, as measured from above the center of interhyal to the anterior tip of the symplectic (orange lines in L,M). At 36 hpf, symplectic cartilage precursors do not protrude beyond the bulk of the second arch *sox9a*:EGFP expression, so 36-hpf 'Sy length' is measured from the anterior edge of second arch *sox9a*:EGFP expression to its center. (L,M) Confocal section of 72-hpf symplectic cartilage, illustrating Sy length measurements (orange lines); oriented anterior to left, dorsal up. Error bars show mean  $\pm$  1.96 times the s.e. Scale bars: 100  $\mu$ m (in I for A-I; in L for L,M).



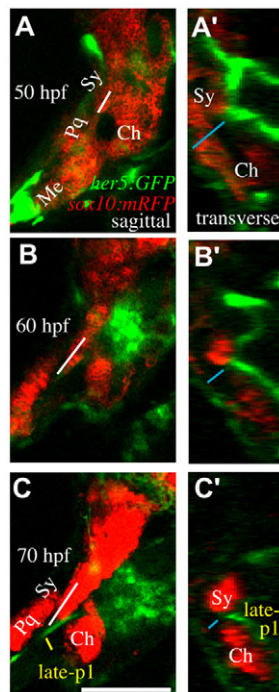

**Fig. 5. Time-lapse microscopy reveals concurrent late-p1 and symplectic outgrowth.** (A–C') *sox10:mRFP* labels cartilages and *her5:GFP* labels late-p1 and some neural cells in these sections. Still images from time-lapse microscopy showing symplectic growth (white line in A–C) and endoderm-ectoderm distance (blue line in A'–C'). (A–C) Sagittal confocal section, anterior to left, dorsal up. By 70 hpf, symplectic tip extends out of the plane of section. (A'–C') Transverse view, lateral to left, dorsal up, constructed from the same confocal stacks. Between 50 and 70 hpf, late-p1 moves laterally through a region between the symplectic and ceratohyal cartilages. By 70 hpf, development is slightly delayed, resulting in a mild reduction of late-p1 and cartilage formation. Scale bar: 100  $\mu$ m.

cartilage development in *fras1* mutants (supplementary material Movie 4) reveals that second arch fusions in *fras1* mutants occur after symplectic extension, via ectopic attachment of symplectic to ceratohyal cartilages. These developmental differences between joint fusions in the first and second arches of *fras1* mutants (failure to separate versus ectopic fusion) indicate that *fras1* uses different mechanisms to shape the first versus the second pharyngeal arch.

### **fras1 stabilizes skeletal development**

Consistent with epithelial *fras1* function, all *fras1* mutants examined have defects in late-p1 formation, whereas *fras1* mutant skeletal defects are frequently less severe, falling within the WT range (Fig. 7A). Hence, our dataset combining WT and *fras1* mutants shows a strong global correlation [correlation (C)=−0.76,  $P<0.0001$ ] between symplectic length and endoderm-ectoderm distance (Fig. 7A). This correlation is also seen among WT fish (C=−0.40,  $P<0.0007$ ); however, in *fras1* mutants endoderm defects are always severe (compared with WT) and the correlation between symplectic length and endoderm-ectoderm distance is lost (C=0.04,  $P<0.86$ ; Fig. 7A).

In *fras1* mutants, asymmetry between left and right symplectic lengths is twice that of their WT counterparts (Fig. 7B). Although *fras1* mutants show a possible mild right side bias to the symplectic length defects, symplectic lengths do not differ significantly between

sides (supplementary material Fig. S4). Instead, asymmetry in symplectic lengths appears to fluctuate randomly between the left and right sides of embryos (Fig. 7C). Such ‘fluctuating asymmetry’ is often interpreted as being due, at least in part, to the presence of random processes perturbing development (e.g. Dongen, 2006) (see Discussion). The degree of fluctuating asymmetry in the symplectic length of *fras1* mutants is at least twice that of WT siblings (Fig. 7C). When defects in all skeletal elements are considered, *fras1* mutants are much more asymmetric than WT siblings, but do not show an antisymmetric (biased towards unilateral) pattern (Fig. 7D). Furthermore, individual *fras1* mutants can present any combination of skeletal defects (Fig. 7E–G'), and the presence of any one overt cartilage defect is a very poor indicator of any other defect (not shown). We hypothesize that the consistent failure of late-p1 formation allows stochastic processes to prominently influence the degree of cartilage defects.

### **DISCUSSION**

We have identified a *fras1*-dependent endodermal outpocket, termed late-p1 (Fig. 8). Late-p1 differs from the more dorsal and early forming portion of endodermal pouch 1 that was previously assumed to constitute the entirety of pouch 1 (Kimmel et al., 2001). It is possible that these previous studies failed to notice late-p1 because it develops after the classical ‘pharyngula’ period of embryogenesis (Kimmel et al., 1995). However, four lines of evidence indicate that late-p1 is a portion of the first pharyngeal pouch. First, late-p1 forms via lateral protrusion of endoderm (Fig. 8), similar to other pouches. Second, late-p1 is the most anterior pouch in the 72-hpf pharynx, similar to human pouch 1 (Hamilton et al., 1947). Third, late-p1 separates first arch-derived cartilages from second arch-derived cartilages (Fig. 8B), also similar to human pouch 1 (Arey, 1966). Although the second arch-derived symplectic cartilage extends dorsal to late-p1, this intrusion is likely to be related to the long-studied function of the symplectic as a first arch-supporting cartilage (De Beer, 1937). Fourth, an illustration of salamander pouch 1 (Lehman, 1987) shows striking similarity to zebrafish late-p1, further linking the morphology of this pouch across vertebrate phylogeny. Hence, we infer that zebrafish late-p1 is indeed a late-forming portion of pouch 1 that has simply gone unnoticed in previous studies. A more complete description of Eustachian tube morphology (pouch 1 derived) and middle ear skeleton morphology (derived from the first two arches) in Fraser syndrome patients might yield fruitful insights as they often have symptoms in both the ear canal and middle ear (e.g. Gattuso et al., 1987) and conductive hearing loss (Smyth and Scambler, 2005). If this homology can be taken as a guide, then endodermal pouching defects might underlie some ear defects in Fraser patients.

*fras1* is expressed in the basal lamina of endoderm and ectoderm surrounding pharyngeal arches. Because late-p1 (endodermal) shape is disrupted in *fras1* mutants, but ectoderm shape is normal, our model focuses on endodermal *fras1* functions (Fig. 8). We find that endodermal *fras1* influences both skeletal and epithelial morphogenesis (Fig. 8A). For instance, endodermal *fras1* is able to rescue facial development in fish that are otherwise mutant for *fras1*. However, WT fish mosaically carrying *fras1* mutant endoderm show subtler defects than non-mosaic *fras1* mutants, perhaps owing to rescue by a remnant of WT endodermal cells (see Carney et al., 2010), or partial anterior late-p1 formation due to anterior connections between late-p1 and the ectodermally derived stomadeum (Fig. 8B,C). Alternatively, the *fras1*→WT mosaic data could be explained by a model wherein *fras1*-dependent signals are

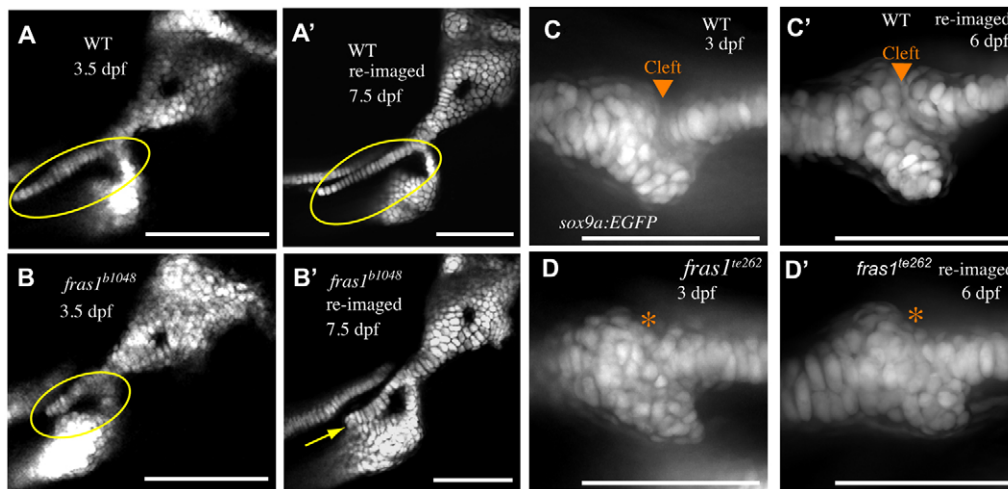

**Fig. 6. Me-Pq fusion occurs by 72 hpf, whereas Sy-Ch fusion often occurs later. (A-B')** Confocal sections of second arch-derived zebrafish skeleton at 3.5 dpf (A,B) and the same skeletal elements reimagined later in development (A',B'). Anterior to left, dorsal up. By 3.5 dpf, a large gap is present between WT symplectic and ceratohyal cartilages (A), and this gap persists through larval development (A'). In *fras1* mutants, although there is often a space between symplectic and ceratohyal cartilage (B, circled) at 3.5 dpf, these skeletal elements are typically found fused together when examined later in larval development (B', yellow arrow). **(C-D')** Confocal projections of first arch joint region, shown anterior to left and dorsal up. By 3 dpf, WT embryos have formed a cleft between Meckel's and palatoquadrate cartilages (C), which persists as the embryos develop (C'). When *fras1* mutants show skeletal fusions in the first arch (D, asterisk) they are always visible by 3 dpf, and persist when re-examined later in larval development (D'). Scale bars: 100  $\mu$ m.

sent from facial ectoderm to pharyngeal skeleton. Nonetheless, it is notable that some mosaic fish lacking *fras1* only in the endoderm show facial defects, supporting a crucial role for endodermal *fras1*.

*Fras1* protein might generate late-p1 by increasing adhesion between pharyngeal endoderm and underlying arch mesenchyme (Fig. 8B). For example, interaction between *Fras1* and the mesenchymally expressed protein *Frem1* is vital to *Fras1* localization and function (Kiyozumi et al., 2006). Previous studies in mammalian cell culture have suggested *Itga8* as another mesenchymally expressed partner of the Fraser complex (Kiyozumi et al., 2005); indeed, mammalian *Itga8* [eMAGE (Richardson et al., 2010)] and zebrafish *itga8* (J.C.T., unpublished observations) are expressed in pharyngeal arch mesenchyme. Many other studies have linked endodermal pouching to skeletal morphology (reviewed by Knight and Schilling, 2006). For instance, loss of early-p1 in zebrafish *itga5* mutants reduces second arch mesenchymal adhesion, resulting in hyomandibular cartilage defects (Crump et al., 2004b). Furthermore, variable loss of posterior pouches in *fgf3* mutants results in variable posterior cartilage fusions (Albertson and Yelick, 2005), analogous to the variable anterior arch cartilage fusions seen in *fras1* mutants after late-p1 loss. Hence, we propose that *fras1* acts in endoderm to autonomously sculpt late-p1 and to non-autonomously sculpt nearby skeletal elements.

Late-p1 might form a physical guide for skeletal development (Fig. 8). WT late-p1 morphogenesis brings endoderm through the symplectic-forming field (Fig. 8A,B), potentially exposing these cells to signals and physical forces that help drive symplectic extension (Fig. 8A, black arrows). WT late-p1 separates symplectic and ceratohyal cartilages (Fig. 8B); loss of late-p1 in *fras1* mutants removes this barrier, facilitating the possibility of fusion later in development (Fig. 8A,B, brown arrows). We cannot explain Me-Pq fusions with an endodermal barrier model because these cartilage elements are not separated by endoderm, even in WT fish (Fig. 8C). Instead, late-p1 might tug on first arch cartilages to pull them apart (Fig. 8A,C, purple arrows), consistent with the physical models proposed for Sy-Ch fusion. Alternatively, late-p1 formation might bring signaling cues that activate joint formation (Fig. 8C, red-orange gradient) closer to the presumptive first arch joint.

The cartilage fusions in *fras1* mutants highlight a more general feature of skeletal fusions: skeletal elements that possess similar identities tend to fuse to one another when normal patterning is disrupted. For example, symplectic and dorsal ceratohyal cartilages are both derived from the intermediate domain of the second arch (Coffin Talbot et al., 2010) and hence have very similar cell identities, allowing their fusion in *fras1* mutants. By contrast, the first arch-derived palatoquadrate cartilage does not fuse to the second arch-derived symplectic cartilages in either WT or *fras1*

**Table 2. Cartilage defects are unstable in *fras1* mutants**

| Genotype                      | Stage   | n   | Defect score | Me-Pq fusion | Sy-Ch fusion | Sy short |
|-------------------------------|---------|-----|--------------|--------------|--------------|----------|
| WT                            | 3.5 dpf | 142 | 0.1          | 3%           | 0%           | 0%       |
|                               | 4.5 dpf | 142 | 0.0          | 0%           | 0%           | 0%       |
|                               | 7.5 dpf | 142 | 0.0          | 0%           | 0%           | 1%       |
| <i>fras1</i> <sup>b1048</sup> | 3.5 dpf | 32  | 3.5          | 78%          | 9%           | 86%      |
|                               | 4.5 dpf | 32  | 4.0          | 83%          | 39%          | 84%      |
|                               | 7.5 dpf | 32  | 4.5          | 83%          | 56%          | 84%      |

Second arch cartilage fusion usually occurs after 3 dpf in *fras1* mutants. Fish were scored live at 3.5 dpf (78–82 hpf) and then the same fish were rescored at 4.5 dpf (102–107 hpf) and 7.5 dpf (174–179 hpf). Fish continue to age during live scoring, resulting in this less-precise staging. See Table 1 for abbreviations.

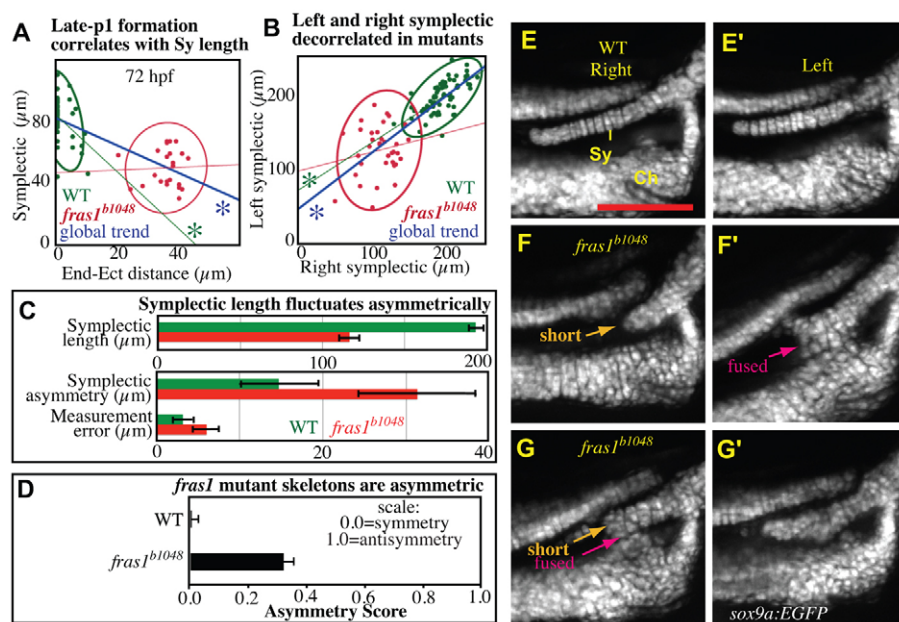

**Fig. 7. Skeletal phenotypes fluctuate asymmetrically in *fras1* mutants.** (A) Plot of 72-hpf right symplectic length versus right endoderm to ectoderm distance, measured as in Fig. 4, with grouped 95% density ellipses. Linear regression reveals that significant correlation (asterisk) between endoderm-ectoderm distances and symplectic length exists in the grouped data, and in WT fish, but not *fras1* mutants. All *fras1* mutant fish show endoderm-ectoderm distance defects; however, *fras1* mutant symplectic lengths are sometimes within the WT range. (B,C) Symplectic length analysis on fish live-imaged at 7.5 dpf. For each side, symplectic length was measured twice, then averaged. (B) Plot of left versus right symplectic length, with grouped 95% density ellipses. In *fras1* mutants, linear regression does not reveal a significant correlation between left and right symplectic lengths. (C) *fras1* mutants show fluctuating asymmetry, twofold higher than WT. This increase in fluctuating asymmetry is much larger than can be accounted for by measurement error. Asymmetry is the absolute value of length differences between sides. Measurement error is estimated as the difference between paired measurements on one side of a fish. (D) Overall skeletal asymmetry of 7.5-dpf fish, calculated as  $A = (|Sy_{short}| + |Sy_{Ch\ fusion}| + |Me-Pq\ fusion|) / 3N$ . (E-G') Second arch joint region of right (E-G) and left (E'-G') individuals imaged live at 7.5 dpf; anterior to left, dorsal up. Compared with WT fish (E,E'), *fras1* mutant phenotypes are often asymmetric (F-G'). For instance, a fish presenting a short, but unfused, symplectic cartilage on one side (F) also shows an extended, but fused, symplectic cartilage on the opposite side (F'). Conversely, the 'short' and 'fused' symplectic phenotypes (G) can be found on one side of a fish that presents only subtle defects (G') on the opposite side. Error bars show mean  $\pm$  1.96 times the s.e. Scale bar: 100  $\mu$ m.

mutant embryos, even though they are not separated by epithelia, suggesting that WT symplectic cartilages are specified not to fuse with the palatoquadrate cartilage. When A-P identity is lost, as is seen in *moz* (*kat6a* – Zebrafish Information Network) mutants (Crump et al., 2006) and *hoxa2*-overexpressing embryos (Hunter and Prince, 2002), second arch cartilages are often found fused to first arch cartilages. Similarly, when arch identity is reduced along the dorsal-ventral axis, as is seen with *edn1* (Walker et al., 2006) and *Bmp* (Alexander et al., 2011) pathway knockdowns, cartilages often fuse together along the dorsal-ventral axis. These findings suggest that nearby skeletal elements have a tendency to fuse together, unless molecularly instructed to do otherwise.

We propose that *fras1* functions in anterior medial endoderm to sculpt late-p1 and thereby stabilize skeletal morphogenesis. The skeletal elements that require *fras1* are intimately associated with late-p1, both in their time of developmental onset and in their spatial locations. In further support of this model, we find a strong correlation between the presence of late-p1 defects and the presence of cartilage defects. All *fras1* mutants show severe late-p1 defects by 72 hpf, and almost all *fras1* mutants present at least one skeletal defect. However, among *fras1* mutants, the degree of endoderm defect does not predict symplectic length. We interpret this to mean that a critical threshold of late-p1 formation is required to buffer skeletal variation, but this threshold is not achieved in any *fras1* mutant. Numerous studies have suggested that loss of developmental

buffering might underlie stochastic phenotypic variation (reviewed by Dongen, 2006; Graham et al., 2010; Polak, 2003). In our model, the loss of *fras1*-dependent developmental stabilization provided by late-p1 allows inherent developmental instability (i.e. stochastic influences) to sometimes result in overt skeletal defects.

Developmental instability may also influence symptomatic expressivity in human Fraser syndrome (Cavalcanti et al., 2007). It is likely that genetic variation also influences some of the observed phenotypic variation in patients with Fraser syndrome (Slavotinek and Tift, 2002). Indeed, mouse *Frem1* mutants can show different phenotypic expressivity on different genetic backgrounds (Smyth et al., 2004). However, given that we expect low genetic and environmental variation between the left and right sides of individual fish heads, we interpret the increased variation between the two sides of individual *fras1* mutant fish as evidence for a stochastic model, consistent with previous interpretations of fluctuating asymmetry (e.g. Polak, 2003). Further evidence for stochasticity arises when multiple axes are examined (Graham et al., 2010); we find facial defects to be asymmetric between the left versus right sides, arch one versus two (not shown), and early versus late developmental periods. Conversely, if genetic factors other than *fras1* are the sole cause of phenotypic variation in *fras1* mutants, we would expect to find different levels of phenotypic variation on different genetic backgrounds. This expectation is not met; zebrafish *fras1* mutants identified in different genetic backgrounds appear very similar to one



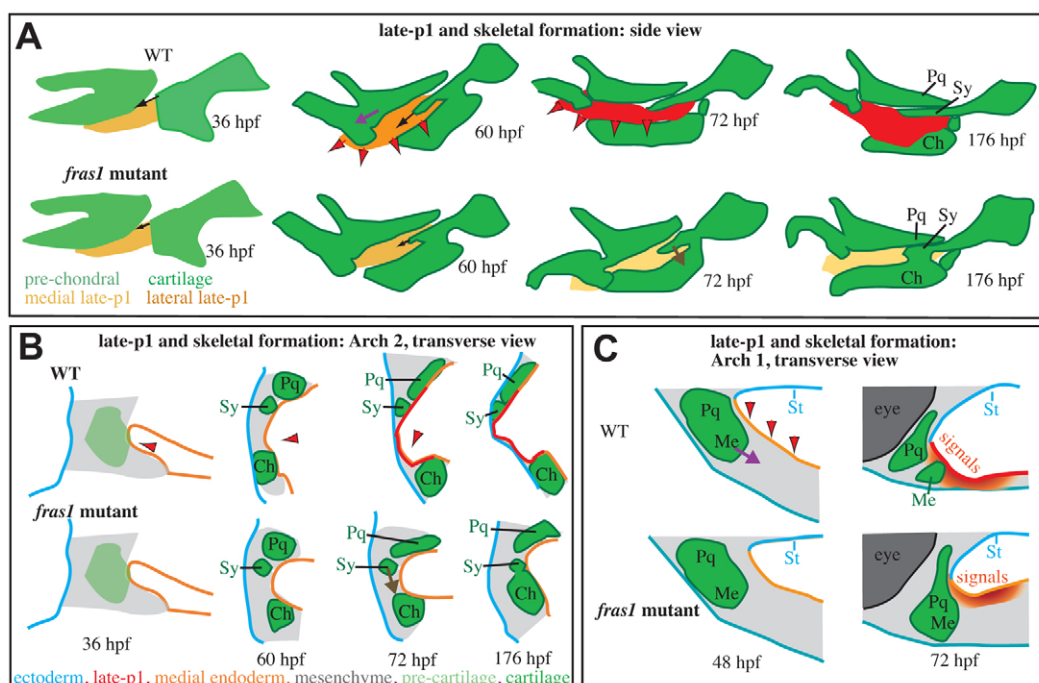

**Fig. 8. *fras1*-dependent late-p1 formation stabilizes zebrafish skeletal development.** (A–C) The movement of late-p1 is primarily across a plane (sagittal, A) orthogonal to the primary plane (transverse, B,C) of cartilage morphogenesis. These processes are intertwined in three dimensions. (B) In the second arch, late-p1 formation brings endoderm through space previously occupied by symplectic precursor cells, and into a region that separates symplectic from ceratohyal. (C) In the first arch, late-p1 formation brings endodermal signaling cues (red-orange gradient) closer to the first arch joint precursors, and might pull Meckel's and palatoquadrate cartilages apart from one another. Late-p1 formation fails in *fras1* mutants, potentially reducing the forces that separate first arch cartilages, and leaving the first arch cartilage joint precursors distant from endodermal signaling cues. Red arrowheads indicate late-p1 movements. Arrows indicate skeletal movements between time points: Sy growth (black), Sy fusion (brown) and Me-Pq separation (purple). Ch, ceratohyal; Me, Meckel's; Pq, palatoquadrate; St, stomodeum; Sy, symplectic.

another in terms of both the type of facial defect and extent of facial variation. Similar to zebrafish *fras1* mutants, human Fraser syndrome patients also show profound variation between siblings (Cavalcanti et al., 2007; Prasun et al., 2007), asymmetry within individual patients (Cavalcanti et al., 2007), and similar variation across distinct families (van Haelst et al., 2008). These observations of Fraser syndrome patients, combined with our observations of genetically similar *fras1* mutant zebrafish raised in tightly controlled environments, indicate that stochastic processes influence Fraser syndrome variation.

#### Acknowledgements

We thank John Dowd and the University of Oregon Fish Facility for the care and maintenance of fish; Poh Kheng Loi and the University of Oregon Histology Laboratory for tissue sectioning; Joseph Okray for help in preparing pertinent background material; and Chi-Bin Chien's laboratory for providing *sox9a:EGFP* transgenics prior to publication.

#### Funding

This work was supported by the National Institutes of Health [grants DE13834 to C.B.K.; DE020076 to J.H.P.; HD22486 to J.H.P., C.B.K. and J.C.T.; T32 HD007348 to J.C.T.; GM07413 to M.B.W.] and the German Research Foundation [Collaborative Research Centre SFB 829 (M.H.)]. Deposited in PMC for release after 12 months.

#### Competing interests statement

The authors declare no competing financial interests.

#### Supplementary material

Supplementary material available online at <http://dev.biologists.org/lookup/suppl/doi:10.1242/dev.074906/-DC1>

#### References

- Alazami, A. M., Shaheen, R., Alzahrani, F., Snape, K., Saggat, A., Brinkmann, B., Bavi, P., Al-Gazali, L. I. and Alkuraya, F. S. (2009). FREM1 mutations cause bifid nose, renal agenesis, and anorectal malformations syndrome. *Am. J. Hum. Genet.* **85**, 414–418.
- Albertson, R. C. and Yelick, P. C. (2005). Roles for *fgf8* signaling in left-right patterning of the visceral organs and craniofacial skeleton. *Dev. Biol.* **283**, 310–321.
- Alexander, C., Zuniga, E., Blitz, I. L., Wada, N., Le Pabic, P., Javidan, Y., Zhang, T., Cho, K. W., Crump, J. G. and Schilling, T. F. (2011). Combinatorial roles for BMPs and Endothelin 1 in patterning the dorsal-ventral axis of the craniofacial skeleton. *Development* **138**, 5135–5146.
- Arey, L. B. (1966). *Developmental Anatomy: a Textbook and Laboratory Manual of Embryology*. Philadelphia and London: W. B. Saunders.
- Carney, T. J., Feitosa, N. M., Sonntag, C., Slanchev, K., Kluger, J., Kiyozumi, D., Gebauer, J. M., Coffin Talbot, J., Kimmel, C. B., Sekiguchi, K. et al. (2010). Genetic analysis of fin development in zebrafish identifies furin and hemicentin1 as potential novel fraser syndrome disease genes. *PLoS Genet.* **6**, e1000907.
- Cavalcanti, D. P., Matejas, V., Luquetti, D., Mello, M. F. and Zenker, M. (2007). Fraser and Ablepharon macrostomia phenotypes: concurrence in one family and association with mutated FRAS1. *Am. J. Med. Genet. A* **143**, 241–247.
- Chiotaki, R., Petrou, P., Giakoumaki, E., Pavlakis, E., Sitaru, C. and Chalepakis, G. (2007). Spatiotemporal distribution of Fras1/Frem proteins during mouse embryonic development. *Gene Expr. Patterns* **7**, 381–388.
- Coffin Talbot, J., Johnson, S. L. and Kimmel, C. B. (2010). *hand2* and *Dlx* genes specify dorsal, intermediate and ventral domains within zebrafish pharyngeal arches. *Development* **137**, 2507–2517.
- Crump, J. G., Maves, L., Lawson, N. D., Weinstein, B. M. and Kimmel, C. B. (2004a). An essential role for *Fgfs* in endodermal pouch formation influences later craniofacial skeletal patterning. *Development* **131**, 5703–5716.
- Crump, J. G., Swartz, M. E. and Kimmel, C. B. (2004b). An integrin-dependent role of pouch endoderm in hyoid cartilage development. *PLoS Biol.* **2**, E244.
- Crump, J. G., Swartz, M. E., Eberhart, J. K. and Kimmel, C. B. (2006). *Moz*-dependent Hox expression controls segment-specific fate maps of skeletal precursors in the face. *Development* **133**, 2661–2669.

- De Beer, G. R. (1937). *The Development of the Vertebrate Skull*. Oxford, UK: Oxford University Press.
- Dongen, S. V. (2006). Fluctuating asymmetry and developmental instability in evolutionary biology: past, present and future. *J. Evol. Biol.* **19**, 1727-1743.
- Fraser, G. R. (1962). Our genetical 'load'. A review of some aspects of genetical variation. *Ann. Hum. Genet.* **25**, 387-415.
- Gattuso, J., Patton, M. A. and Baraitser, M. (1987). The clinical spectrum of the Fraser syndrome: report of three new cases and review. *J. Med. Genet.* **24**, 549-555.
- Gautier, P., Naranjo-Golborne, C., Taylor, M. S., Jackson, I. J. and Smyth, I. (2008). Expression of the fras1/frem gene family during zebrafish development and fin morphogenesis. *Dev. Dyn.* **237**, 3295-3304.
- Graham, A., Okabe, M. and Quinlan, R. (2005). The role of the endoderm in the development and evolution of the pharyngeal arches. *J. Anat.* **207**, 479-487.
- Graham, J. H., Raz, S., Hel-Or, H. and Nevo, E. (2010). Fluctuating asymmetry: methods, theory, and applications. *Symmetry* **2**, 466-540.
- Hamilton, W. J., Boyd, J. D. and Mossman, H. W. (1947). *Human Embryology (Prenatal Development of Form and Function)*. Baltimore, MD: Williams and Wilkins.
- Hunter, M. P. and Prince, V. E. (2002). Zebrafish hox paralogue group 2 genes function redundantly as selector genes to pattern the second pharyngeal arch. *Dev. Biol.* **247**, 367-389.
- Jadeja, S., Smyth, I., Pitera, J. E., Taylor, M. S., van Haelst, M., Bentley, E., McGregor, L., Hopkins, J., Chalepakis, G., Philip, N. et al. (2005). Identification of a new gene mutated in Fraser syndrome and mouse myelencephalic blebs. *Nat. Genet.* **37**, 520-525.
- Kimmel, C. B., Ballard, W. W., Kimmel, S. R., Ullmann, B. and Schilling, T. F. (1995). Stages of embryonic development of the zebrafish. *Dev. Dyn.* **203**, 253-310.
- Kimmel, C. B., Miller, C. T. and Keynes, R. J. (2001). Neural crest patterning and the evolution of the jaw. *J. Anat.* **199**, 105-120.
- Kirby, B. B., Takada, N., Latimer, A. J., Shin, J., Carney, T. J., Kelsh, R. N. and Appel, B. (2006). In vivo time-lapse imaging shows dynamic oligodendrocyte progenitor behavior during zebrafish development. *Nat. Neurosci.* **9**, 1506-1511.
- Kiyozumi, D., Osada, A., Sugimoto, N., Weber, C. N., Ono, Y., Imai, T., Okada, A. and Sekiguchi, K. (2005). Identification of a novel cell-adhesive protein spatiotemporally expressed in the basement membrane of mouse developing hair follicle. *Exp. Cell Res.* **306**, 9-23.
- Kiyozumi, D., Sugimoto, N. and Sekiguchi, K. (2006). Breakdown of the reciprocal stabilization of QBRICK/Frem1, Fras1, and Frem2 at the basement membrane provokes Fraser syndrome-like defects. *Proc. Natl. Acad. Sci. USA* **103**, 11981-11986.
- Knight, R. D. and Schilling, T. F. (2006). Cranial neural crest and development of the head skeleton. *Adv. Exp. Med. Biol.* **589**, 120-133.
- Lehman, H. E. (1987). *Chordate Development: a Practical Textbook with Atlases and Techniques for Experimental and Descriptive Embryology*. Winston-Salem, NC: Hunter Textbooks.
- McGregor, L., Makela, V., Darling, S. M., Vrontou, S., Chalepakis, G., Roberts, C., Smart, N., Rutland, P., Prescott, N., Hopkins, J. et al. (2003). Fraser syndrome and mouse blebbed phenotype caused by mutations in FRAS1/Fras1 encoding a putative extracellular matrix protein. *Nat. Genet.* **34**, 203-208.
- Palmer, R. A. and Strobeck, C. (2003). Fluctuating asymmetry analyses revisited. In *Developmental Instability: Causes and Consequences* (ed. M. Polak), pp. 279-319. Oxford, UK: Oxford University Press.
- Petrou, P., Chiotaki, R., Dalezios, Y. and Chalepakis, G. (2007). Overlapping and divergent localization of Frem1 and Fras1 and its functional implications during mouse embryonic development. *Exp. Cell Res.* **313**, 910-920.
- Polak, M. (ed.) (2003). *Developmental Instability: Causes and Consequences*. Oxford, UK: Oxford University Press.
- Prasun, P., Pradhan, M. and Goel, H. (2007). Intrafamilial variability in Fraser syndrome. *Prenat. Diagn.* **27**, 778-782.
- Richardson, L., Venkataraman, S., Stevenson, P., Yang, Y., Burton, N., Rao, J., Fisher, M., Baldock, R. A., Davidson, D. R. and Christiansen, J. H. (2010). EMAGE mouse embryo spatial gene expression database: 2010 update. *Nucleic Acids Res.* **38**, D703-D709.
- Rodriguez-Mari, A., Yan, Y. L., Bremiller, R. A., Wilson, C., Canestro, C. and Postlethwait, J. H. (2005). Characterization and expression pattern of zebrafish Anti-Mullerian hormone (Amh) relative to sox9a, sox9b, and cyp19a1a, during gonad development. *Gene Expr. Patterns* **5**, 655-667.
- Shafeghati, Y., Kniepert, A., Vakili, G. and Zenker, M. (2008). Fraser syndrome due to homozygosity for a splice site mutation of FREM2. *Am. J. Med. Genet. A* **146A**, 529-531.
- Slavotinek, A., Li, C., Sherr, E. H. and Chudley, A. E. (2006). Mutation analysis of the FRAS1 gene demonstrates new mutations in a proband with Fraser syndrome. *Am. J. Med. Genet. A* **140**, 1909-1914.
- Slavotinek, A. M. and Tift, C. J. (2002). Fraser syndrome and cryptophthalmos: review of the diagnostic criteria and evidence for phenotypic modules in complex malformation syndromes. *J. Med. Genet.* **39**, 623-633.
- Slavotinek, A. M., Baranzini, S. E., Schanze, D., Labelle-Dumais, C., Short, K. M., Chao, R., Yahyavi, M., Bijlsma, E. K., Chu, C., Musone, S. et al. (2011). Manitoba-oculo-tricho-anal (MOTA) syndrome is caused by mutations in FREM1. *J. Med. Genet.* **48**, 375-382.
- Smyth, I. and Scambler, P. (2005). The genetics of Fraser syndrome and the blebs mouse mutants. *Hum. Mol. Genet.* **14 Spec. No. 2**, R269-R274.
- Smyth, I., Du, X., Taylor, M. S., Justice, M. J., Beutler, B. and Jackson, I. J. (2004). The extracellular matrix gene Frem1 is essential for the normal adhesion of the embryonic epidermis. *Proc. Natl. Acad. Sci. USA* **101**, 13560-13565.
- Tallafuss, A. and Bally-Cuif, L. (2003). Tracing of her5 progeny in zebrafish transgenics reveals the dynamics of midbrain-hindbrain neurogenesis and maintenance. *Development* **130**, 4307-4323.
- Thomas, I. T., Frias, J. L., Felix, V., Sanchez de Leon, L., Hernandez, R. A. and Jones, M. C. (1986). Isolated and syndromic cryptophthalmos. *Am. J. Med. Genet.* **25**, 85-98.
- van Haelst, M. M., Scambler, P. J. and Hennekam, R. C. (2007). Fraser syndrome: a clinical study of 59 cases and evaluation of diagnostic criteria. *Am. J. Med. Genet. A* **143**, 3194-3203.
- van Haelst, M. M., Maiburg, M., Baujat, G., Jadeja, S., Monti, E., Bland, E., Pearce, K., Hennekam, R. C. and Scambler, P. J. (2008). Molecular study of 33 families with Fraser syndrome new data and mutation review. *Am. J. Med. Genet. A* **146**, 2252-2257.
- Vrontou, S., Petrou, P., Meyer, B. I., Galanopoulos, V. K., Imai, K., Yanagi, M., Chowdhury, K., Scambler, P. J. and Chalepakis, G. (2003). Fras1 deficiency results in cryptophthalmos, renal agenesis and blebbed phenotype in mice. *Nat. Genet.* **34**, 209-214.
- Walker, M. B. and Kimmel, C. B. (2007). A two-color acid-free cartilage and bone stain for zebrafish larvae. *Biotech. Histochem.* **82**, 23-28.
- Walker, M. B., Miller, C. T., Coffin Talbot, J., Stock, D. W. and Kimmel, C. B. (2006). Zebrafish furin mutants reveal intricacies in regulating Endothelin1 signaling in craniofacial patterning. *Dev. Biol.* **295**, 194-205.
- Walker, M. B., Miller, C. T., Swartz, M. E., Eberhart, J. K. and Kimmel, C. B. (2007). phospholipase C, beta 3 is required for Endothelin1 regulation of pharyngeal arch patterning in zebrafish. *Dev. Biol.* **304**, 194-207.
